# Supplementary material for: Freshwater carbon and nutrient cycles revealed through reconstructed population genomes
Source: PeerJ. 2018 Dec 10;6:e6075. doi: 10.7717/peerj.6075 (PMC6292386; doi:10.7717/peerj.6075)
Supplement: Supplemental Information 5 — Information about the completeness, size, and taxonomy of our MAGs, as well as their IMG OIDs, are presented here. [file peerj-06-6075-s005.xlsx]

## Sheet: Supplemental_Data_S2
IMG_Genome_ID	Genome_Name	Lake	Taxonomy	Taxonomy assignment method	Confidence in manual taxonomy assignment	Genome_Size	Est_Completeness	Est_Redundancy	GC_Content	Codon_Usage	Amino_Acid_Bias	Gene_Count
2582580512	ME10020	Mendota	Planctomycetes;Planctomycetia;Planctomycetales;;;	Phylosift		2684295	65.1343	1.13636	0.5441	0.168827	1.723	2450
2582580513	ME10152	Mendota	Actinobacteria;Actinobacteria;Actinomycetales;;;	Phylosift		2093635	56.9557	0.726129	0.67	0.374611	1.67	2111
2582580514	ME10417	Mendota	Tenericutes;Mollicutes;Mycoplasmatales;;;	Phylosift		852268	83.1656	2.80899	0.3942	0.2853	1.636	895
2582580515	ME10739	Mendota	Proteobacteria;Betaproteobacteria;Burkholderiales;Alcaligenaceae;Zwartia;alpina	Phylogeny	Medium	2631188	83.9095	7.40741	0.5312	0.145344	1.731	2597
2582580516	ME10873	Mendota	Proteobacteria;Deltaproteobacteria;[Blank];;;	Phylosift		2235809	90.0932	1.7094	0.3494	0.289078	1.653	2076
2582580517	ME01091	Mendota	Actinobacteria;Actinobacteria;Acidimicrobiales;;;	Phylosift		1782609	84.1379	5.17241	0.5383	0.184785	1.664	1845
2582580518	ME00112	Mendota	Cyanobacteria;[Blank];[Blank];;;	Phylosift		3123153	79.5347	3.22222	0.3721	0.305154	1.671	2941
2582580519	ME11260	Mendota	Bacteroidetes;Cytophagia;Cytophagales;;;	Phylosift		1580367	61.5018	4.54545	0.4124	0.207436	1.643	1537
2582580520	ME11576	Mendota	Actinobacteria;Actinobacteria;Acidimicrobiales;;;	Phylosift		1204534	66.8566	3.84615	0.5984	0.232165	1.713	1337
2582580521	ME12173	Mendota	Verrucomicrobia;Verrucomicrobiae;Verrucomicrobiales;;;	Phylosift		2103165	67.8571	3.40136	0.5194	0.209736	1.699	2043
2582580522	ME12555	Mendota	Planctomycetes;[Blank];[Blank];;;	Phylosift		3371651	89.2473	3.76344	0.6718	0.385592	1.77	2909
2582580523	ME12612	Mendota	Verrucomicrobia;[Blank];[Blank];;;	Phylosift		2234628	82.7398	3.23129	0.5945	0.307211	1.695	2301
2582580524	ME12657	Mendota	Verrucomicrobia;Opitutae;Puniceicoccales;;;	Phylosift		1945716	79.245	4.58025	0.6782	0.478912	1.728	1792
2582580525	ME01300	Mendota	Cyanobacteria;[Blank];[Blank];;;	Phylosift		2333569	86.3431	7.65399	0.6878	0.468073	1.747	2527
2582580526	ME13165	Mendota	Bacteroidetes;Flavobacteriia;Flavobacteriales;;;	Phylosift		3312293	93.0108	6.73835	0.608	0.337541	1.689	2980
2582580527	ME13530	Mendota	Bacteroidetes;Flavobacteriia;Flavobacteriales;;;	Phylosift		2376430	88.1625	5.35925	0.341	0.297966	1.64	2194
2582580528	ME01363	Mendota	Actinobacteria;Actinobacteria;Actinomycetales;acI;acI-A;	Phylogeny	High	911592	62.188	6.89223	0.4513	0.222708	1.624	950
2582580529	ME14003	Mendota	Planctomycetes;Planctomycetia;Planctomycetales;;;	Phylosift		3213612	69.8187	3.48837	0.5173	0.17071	1.706	2766
2582580530	ME14260	Mendota	Actinobacteria;Actinobacteria;Acidimicrobiales;;;	Phylosift		1498931	66.7832	1.9943	0.5083	0.180713	1.674	1599
2582580531	ME14445	Mendota	Cyanobacteria;[Blank];[Blank];;;	Phylosift		3309584	89.9457	2.98913	0.5768	0.258171	1.702	3116
2582580532	ME14726	Mendota	Bacteroidetes;Sphingobacteriia;Sphingobacteriales;;;	Phylosift		2512767	87.0279	8.74384	0.4447	0.165805	1.649	2280
2582580533	ME15216	Mendota	Bacteroidetes;Sphingobacteriia;Sphingobacteriales;;;	Phylosift		2272733	66.8801	1.97044	0.4699	0.150075	1.669	2033
2582580536	ME15954	Mendota	Planctomycetes;Planctomycetia;Planctomycetales;;;	Phylosift		4122388	71.6609	0.588235	0.5207	0.154795	1.724	3377
2582580537	ME01627	Mendota	Cyanobacteria;[Blank];[Blank];;;	Phylosift		4154717	93.3406	3.49345	0.3971	0.308769	1.666	3798
2582580538	ME16806	Mendota	Proteobacteria;Betaproteobacteria;Burkholderiales;Alcaligenaceae;Zwartia;alpina	Phylogeny	Medium	3110597	82.4417	4.69822	0.6358	0.306702	1.718	3077
2582580539	ME01719	Mendota	Actinobacteria;Actinobacteria;Acidimicrobiales;;;	Phylosift		1793743	80.6897	3.44828	0.5136	0.177582	1.648	1872
2582580540	ME17476	Mendota	[Blank];[Blank];[Blank];;;	Phylosift		5340721	95.2249	3.52941	0.5217	0.143534	1.729	4185
2582580541	ME17509	Mendota	Bacteroidetes;Sphingobacteriia;Sphingobacteriales;;;	Phylosift		1553935	76.1056	5.43514	0.4066	0.18979	1.656	1538
2582580542	ME18138	Mendota	Planctomycetes;Planctomycetia;Planctomycetales;;;	Phylosift		2122990	53.9554	1.35841	0.6881	0.427813	1.722	1951
2582580543	ME18233	Mendota	Bacteroidetes;Flavobacteriia;Flavobacteriales;;;	Phylosift		1798465	68.651	3.76344	0.4138	0.184929	1.626	1721
2582580544	ME01953	Mendota	Actinobacteria;Actinobacteria;Acidimicrobiales;;;	Phylosift		2350389	90.5983	9.11681	0.6731	0.343182	1.657	2337
2582580545	ME19941	Mendota	[Blank];[Blank];[Blank];;;	Phylosift		1439254	64.6084	1.91257	0.5418	0.205339	1.695	1419
2582580546	ME02014	Mendota	Verrucomicrobia;Opitutae;[Blank];;;	Phylosift		1851081	79.8887	5.40541	0.6573	0.455841	1.718	1670
2582580547	ME20494	Mendota	Planctomycetes;Planctomycetia;Planctomycetales;;;	Phylosift		4364939	72.9501	1.14943	0.6582	0.322964	1.768	3215
2582580548	ME22738	Mendota	Bacteroidetes;Sphingobacteriia;Sphingobacteriales;;;	Phylosift		2326823	90.4762	2.31527	0.4135	0.161823	1.652	2084
2582580549	ME02278	Mendota	Bacteroidetes;Flavobacteriia;Flavobacteriales;;;	Phylosift		2610574	85.0353	7.06714	0.3315	0.315476	1.617	2471
2582580550	ME02297	Mendota	Actinobacteria;Actinobacteria;Actinomycetales;acI;acI-A;	Phylogeny	High	1366118	75	8.62069	0.4709	0.188416	1.625	1385
2582580551	ME02353	Mendota	Cyanobacteria;[Blank];[Blank];;;	Phylosift		3350202	87.6132	5.01894	0.6514	0.368305	1.747	3378
2582580552	ME02384	Mendota	Cyanobacteria;[Blank];[Blank];;;	Phylosift		4193130	81.0635	1.96507	0.4197	0.269943	1.677	4197
2582580553	ME02538	Mendota	Actinobacteria;Actinobacteria;Actinomycetales;;;	Phylosift		1050638	65.7418	0.578035	0.4631	0.20157	1.603	1014
2582580554	ME02729	Mendota	Actinobacteria;Actinobacteria;Acidimicrobiales;;;	Phylosift		1671027	69.279	6.89655	0.5357	0.190393	1.652	1725
2582580555	ME00283	Mendota	Actinobacteria;Actinobacteria;Actinomycetales;acI;acI-B;acI-B1	Phylogeny	High	734855	59.1028	3.24561	0.3978	0.255212	1.62	785
2582580556	ME28789	Mendota	Proteobacteria;Betaproteobacteria;Rhodocyclales;;;	Phylosift		2829293	79.9278	3.08264	0.6355	0.367802	1.715	2933
2582580557	ME02898	Mendota	Proteobacteria;Betaproteobacteria;[Blank];;;	Phylosift		860016	50.8421	4.91333	0.4643	0.179002	1.684	917
2582580558	ME02907	Mendota	Planctomycetes;Planctomycetia;Planctomycetales;;;	Phylosift		4006763	67.7578	2.35294	0.5525	0.189079	1.726	3083
2582580559	ME30509	Mendota	Verrucomicrobia;[Blank];[Blank];;;	Phylosift		1236889	55.6757	4.20267	0.6251	0.293459	1.735	1139
2582580560	ME03061	Mendota	Planctomycetes;Planctomycetia;Planctomycetales;;;	Phylosift		4808660	94.0484	4.70588	0.525	0.15158	1.722	3762
2582580561	ME03080	Mendota	Proteobacteria;Betaproteobacteria;Nitrosomonadales;Methylophilaceae;Methylotenera;	Phylogeny	High	1320940	68.9655	3.44828	0.4975	0.235606	1.653	1348
2582580562	ME30805	Mendota	[Blank];[Blank];[Blank];;;	Phylosift		1047154	54.8589	0	0.3465	0.29659	1.643	1165
2582580563	ME03085	Mendota	Bacteroidetes;Sphingobacteriia;Sphingobacteriales;;;	Phylosift		1783923	78.8834	6.27258	0.3108	0.358626	1.641	1718
2582580564	ME03119	Mendota	Actinobacteria;Actinobacteria;[Blank];;;	Phylosift		1072419	71.1207	6.89655	0.4375	0.21254	1.629	1112
2582580565	ME03163	Mendota	Actinobacteria;Actinobacteria;Acidimicrobiales;;;	Phylosift		1785483	73.7892	5.12821	0.5239	0.188977	1.658	1898
2582580566	ME03293	Mendota	Proteobacteria;Gammaproteobacteria;Methylococcales;;;	Phylosift		2331128	77.193	5.26316	0.4019	0.279904	1.654	2261
2582580567	ME33807	Mendota	Cyanobacteria;[Blank];[Blank];;;	Phylosift		2003587	63.6134	0.888889	0.3955	0.23555	1.681	2054
2582580568	ME34551	Mendota	Bacteroidetes;Flavobacteriia;Flavobacteriales;;;	Phylosift		2923340	85.9319	1.25448	0.4401	0.160426	1.625	2531
2582580569	ME03611	Mendota	Planctomycetes;Planctomycetia;Planctomycetales;;;	Phylosift		3284619	51.8853	1.61643	0.4344	0.19919	1.66	2827
2582580570	ME36464	Mendota	Proteobacteria;[Blank];[Blank];;;	Phylosift		1017159	74.1935	0	0.3861	0.266748	1.659	1224
2582580571	ME03713	Mendota	Bacteroidetes;Sphingobacteriia;[Blank];;;	Phylosift		1740562	79.2857	6.95238	0.4582	0.194234	1.656	1551
2582580572	ME03864	Mendota	Actinobacteria;Actinobacteria;Actinomycetales;acI;acI-C;	Phylogeny	Medium	786155	55.094	3.44828	0.4802	0.182934	1.654	818
2582580573	ME03880	Mendota	Verrucomicrobia;Verrucomicrobiae;Verrucomicrobiales;;;	Phylosift		1581403	72.4283	3.62812	0.5814	0.283999	1.724	1558
2582580575	ME04252	Mendota	Actinobacteria;Actinobacteria;Actinomycetales;acI;acI-B;	Phylogeny	High	1144269	68.7255	4.90196	0.4488	0.199156	1.615	1180
2582580576	ME04498	Mendota	Cyanobacteria;[Blank];[Blank];;;	Phylosift		2772794	92.1196	6.74819	0.6405	0.321237	1.737	2887
2582580577	ME04500	Mendota	Cyanobacteria;[Blank];[Blank];;;	Phylosift		2819350	94.4746	3.80435	0.6756	0.433521	1.763	3018
2582580578	ME04620	Mendota	Planctomycetes;Planctomycetia;Planctomycetales;;;	Phylosift		4653018	85.6401	0.802139	0.5208	0.16753	1.718	3570
2582580579	ME46339	Mendota	[Blank];[Blank];[Blank];;;	Phylosift		733334	80.8777	4.31034	0.3198	0.337409	1.638	743
2582580580	ME05184	Mendota	Bacteroidetes;Flavobacteriia;Flavobacteriales;;;	Phylosift		1284389	58.9617	2.73224	0.4337	0.192021	1.645	1191
2582580581	ME05338	Mendota	Proteobacteria;Alphaproteobacteria;Sphingomonadales;;;	Phylosift		1691699	67.1709	7.98066	0.558	0.205259	1.673	1805
2582580582	ME05344	Mendota	Bacteroidetes;[Blank];[Blank];;;	Phylosift		1533163	81.5185	2.53968	0.5314	0.197542	1.738	1417
2582580583	ME05466	Mendota	Bacteroidetes;Sphingobacteriia;[Blank];;;	Phylosift		2085652	77.1038	2.18579	0.4319	0.182827	1.654	1888
2582580584	ME00548	Mendota	Cyanobacteria;[Blank];[Blank];;;	Phylosift		4099996	82.963	1.89583	0.3805	0.304923	1.669	3951
2582580585	ME05493	Mendota	Bacteroidetes;Sphingobacteriia;Sphingobacteriales;;;	Phylosift		2257317	59.9579	1.26263	0.3704	0.22936	1.634	1989
2582580586	ME05513	Mendota	Bacteroidetes;[Blank];[Blank];;;	Phylosift		2170171	66.1429	5.95238	0.3358	0.292296	1.619	2128
2582580587	ME05895	Mendota	Bacteroidetes;Sphingobacteriia;Sphingobacteriales;;;	Phylosift		1297462	53.1281	1.47783	0.3307	0.321748	1.628	1327
2582580588	ME05983	Mendota	Bacteroidetes;Sphingobacteriia;Sphingobacteriales;;;	Phylosift		2908334	88.4236	9.35961	0.404	0.227439	1.667	2619
2582580589	ME05999	Mendota	Bacteroidetes;Sphingobacteriia;Sphingobacteriales;;;	Phylosift		2930247	90.093	5.50082	0.4183	0.206264	1.657	2632
2582580590	ME06031	Mendota	Bacteroidetes;Sphingobacteriia;Sphingobacteriales;;;	Phylosift		1331396	49.7291	0.492611	0.3119	0.356009	1.621	1365
2582580591	ME06097	Mendota	Cyanobacteria;[Blank];[Blank];;;	Phylosift		1913277	84.5299	0	0.3583	0.250741	1.645	1782
2582580592	ME06180	Mendota	Bacteroidetes;Flavobacteriia;Flavobacteriales;;;	Phylosift		2716659	95.146	3.73969	0.3356	0.31638	1.616	2551
2582580593	ME06381	Mendota	Verrucomicrobia;Verrucomicrobiae;Verrucomicrobiales;;;	Phylosift		2354802	63.3077	0	0.5673	0.214092	1.72	2193
2582580594	ME06450	Mendota	Chlamydiae;Chlamydiia;Chlamydiales;;;	Phylosift		2759591	88.1757	1.57658	0.4049	0.207912	1.685	2534
2582580595	ME06647	Mendota	Actinobacteria;Actinobacteria;Actinomycetales;;;	Phylosift		906713	58.139	2.34234	0.4396	0.224806	1.624	960
2582580596	ME06777	Mendota	Bacteroidetes;Sphingobacteriia;Sphingobacteriales;;;	Phylosift		2325963	87.5862	4.08046	0.3567	0.27149	1.635	2054
2582580597	ME06778	Mendota	Bacteroidetes;Flavobacteriia;Flavobacteriales;;;	Phylosift		1868933	63.8165	1.35135	0.4031	0.218707	1.642	1853
2582580598	ME00068	Mendota	Proteobacteria;Betaproteobacteria;Nitrosomonadales;Methylophilaceae;Methylopumilus(LD28);	Phylogeny	High	593228	50.0335	3.15934	0.3689	0.277093	1.658	705
2582580599	ME06813	Mendota	Bacteroidetes;[Blank];[Blank];;;	Phylosift		3400639	89.0476	1.03175	0.34	0.260133	1.625	2971
2582580600	ME07043	Mendota	Proteobacteria;Betaproteobacteria;Burkholderiales;;;	Phylosift		2550905	88.1422	5.92679	0.6564	0.366544	1.747	2430
2582580601	ME07198	Mendota	Bacteroidetes;Sphingobacteriia;Sphingobacteriales;;;	Phylosift		2736634	74.7455	5.73892	0.4694	0.164579	1.667	2686
2582580602	ME07257	Mendota	Bacteroidetes;Flavobacteriia;Flavobacteriales;;;	Phylosift		1284442	57.9361	3.24324	0.3931	0.223349	1.642	1346
2582580603	ME07484	Mendota	Bacteroidetes;Cytophagia;Cytophagales;;;	Phylosift		3659184	87.4504	6.45833	0.4175	0.187063	1.656	3615
2582580605	ME07690	Mendota	Bacteroidetes;Sphingobacteriia;Sphingobacteriales;;;	Phylosift		1813804	86.2069	11.8227	0.4848	0.154283	1.678	1651
2582580606	ME07803	Mendota	Planctomycetes;Planctomycetia;Planctomycetales;;;	Phylosift		2973502	80.1724	1.14943	0.7067	0.453905	1.747	2596
2582580607	ME08366	Mendota	Verrucomicrobia;Spartobacteria;[Blank];;;	Phylosift		3551150	84.5886	5.06757	0.633	0.361666	1.73	3410
2582580608	ME00885	Mendota	Actinobacteria;Actinobacteria;Actinomycetales;acI;acI-C;	Phylogeny	Medium	866493	61.6379	5.17241	0.4425	0.208092	1.634	886
2582580609	ME09104	Mendota	Proteobacteria;Gammaproteobacteria;Xanthomonadales;;;	Phylosift		2143680	84.4522	7.69424	0.5988	0.225246	1.745	2069
2582580610	ME09147	Mendota	Bacteroidetes;Sphingobacteriia;Sphingobacteriales;;;	Phylosift		2074546	89.0805	7.88177	0.3646	0.206451	1.635	1856
2582580611	ME09166	Mendota	Planctomycetes;Planctomycetia;Planctomycetales;;;	Phylosift		5467700	98.6851	2.35294	0.5797	0.191879	1.758	3984
2582580612	ME09351	Mendota	Tenericutes;[Blank];[Blank];;;	Phylosift		799895	67.7577	1.1236	0.3755	0.290445	1.628	810
2582580613	ME09495	Mendota	Bacteroidetes;[Blank];[Blank];;;	Phylosift		2153459	79.8413	4.44444	0.3687	0.249434	1.636	1913
2582580614	ME09830	Mendota	Bacteroidetes;Sphingobacteriia;Sphingobacteriales;;;	Phylosift		2317383	91.9212	4.4335	0.3812	0.209774	1.64	2111
2582580615	TE01149	Trout Bog Epilimnion	Proteobacteria;Gammaproteobacteria;Methylococcales;;;	Phylosift		2573146	73.6842	3.50877	0.3978	0.259046	1.651	2391
2582580616	TE01301	Trout Bog Epilimnion	Verrucomicrobia;Opitutae;[Blank];;;	Phylosift		2036179	95.2703	0	0.5449	0.218159	1.71	1896
2582580617	TE00149	Trout Bog Epilimnion	Actinobacteria;[Blank];[Blank];;;	Phylosift		764032	64.1026	1.7094	0.5501	0.200514	1.649	895
2582580620	TE02093	Trout Bog Epilimnion	Proteobacteria;Betaproteobacteria;Burkholderiales;Burkholderiaceae;Polynucleobacter;PnecC	Phylogeny	High	1458458	66.3793	1.72414	0.45	0.182323	1.657	1490
2582580621	TE02094	Trout Bog Epilimnion	Proteobacteria;Betaproteobacteria;Burkholderiales;Burkholderiaceae;Polynucleobacter;PnecC	Phylogeny	High	2210814	78.6207	0	0.4428	0.188588	1.652	2215
2582580622	TE00211	Trout Bog Epilimnion	Chlorobi;Chlorobia;Chlorobiales;;;	Phylosift		2469065	93.956	1.0989	0.4592	0.183515	1.669	2365
2582580623	TE02167	Trout Bog Epilimnion	Proteobacteria;Betaproteobacteria;Nitrosomonadales;Methylophilaceae;Methylotenera;	Phylogeny	High	1423270	87.6246	1.94822	0.4257	0.202779	1.652	1439
2582580624	TE02443	Trout Bog Epilimnion	Proteobacteria;Deltaproteobacteria;Bdellovibrionales;;;	Phylosift		1640808	74.0513	0	0.4029	0.25003	1.709	1434
2582580625	TE02493	Trout Bog Epilimnion	Chlorobi;Chlorobia;Chlorobiales;;;	Phylosift		2371355	89.011	2.1978	0.4582	0.189232	1.672	2357
2582580627	TE02754	Trout Bog Epilimnion	Actinobacteria;Actinobacteria;Actinomycetales;acI;acI-B;	Phylogeny	High	1361355	82.2669	1.56642	0.5018	0.159261	1.626	1398
2582580628	TE02973	Trout Bog Epilimnion	Actinobacteria;Actinobacteria;Acidimicrobiales;;;	Phylosift		1010358	72.4138	0	0.4965	0.186936	1.641	1052
2582580629	TE03083	Trout Bog Epilimnion	Proteobacteria;Alphaproteobacteria;Rickettsiales;;;	Phylosift		1401432	98.5782	9.00474	0.3368	0.275613	1.63	1352
2582580630	TE03207	Trout Bog Epilimnion	Actinobacteria;Actinobacteria;Actinomycetales;acI;acI-B;	Phylogeny	High	1245790	75.5639	2.70677	0.4733	0.163069	1.631	1301
2582580631	TE03256	Trout Bog Epilimnion	Actinobacteria;Actinobacteria;Acidimicrobiales;;;	Phylosift		1750488	85.7809	4.2735	0.6435	0.322819	1.635	1846
2582580632	TE03475	Trout Bog Epilimnion	Actinobacteria;Actinobacteria;Actinomycetales;acI;acI-B;	Phylogeny	High	949240	69.4561	1.84211	0.5055	0.205869	1.636	1005
2582580633	TE03838	Trout Bog Epilimnion	Proteobacteria;Betaproteobacteria;Burkholderiales;Burkholderiaceae;Polynucleobacter;PnecC	Phylogeny	High	1727630	62.069	1.72414	0.4474	0.189688	1.649	1845
2582580634	TE04163	Trout Bog Epilimnion	Actinobacteria;Actinobacteria;Acidimicrobiales;;;	Phylosift		1267473	69.6201	1.28205	0.5637	0.173876	1.632	1368
2582580635	TE04208	Trout Bog Epilimnion	Actinobacteria;Actinobacteria;Actinomycetales;acI;acI-B;	Phylogeny	High	992136	68.5345	1.72414	0.4587	0.210265	1.622	1046
2582580637	TE04548	Trout Bog Epilimnion	Proteobacteria;Betaproteobacteria;Burkholderiales;Comamonadaceae;Rhodoferax;	Phylogeny	Medium	2999617	75.884	0.46729	0.6273	0.335048	1.691	3084
2582580638	TE04605	Trout Bog Epilimnion	Verrucomicrobia;Verrucomicrobiae;Verrucomicrobiales;;;	Phylosift		4671051	92.2449	0.816327	0.5924	0.272607	1.704	4345
2582580639	TE05136	Trout Bog Epilimnion	Proteobacteria;Gammaproteobacteria;Methylococcales;;;	Phylosift		2778362	91.7061	1.12457	0.4124	0.239409	1.651	2620
2582580640	TE05144	Trout Bog Epilimnion	Bacteroidetes;Sphingobacteriia;Sphingobacteriales;;;	Phylosift		1999931	90.8046	1.14943	0.3472	0.298943	1.619	1846
2582580641	TE05243	Trout Bog Epilimnion	Acidobacteria;Solibacteres;Solibacterales;;;	Phylosift		2517309	65.5214	1.05263	0.6258	0.342593	1.692	2500
2582580642	TE00567	Trout Bog Epilimnion	Proteobacteria;Betaproteobacteria;Burkholderiales;Burkholderiaceae;Polynucleobacter;PnecC	Phylogeny	High	1660228	71.8966	0	0.4584	0.186027	1.65	1742
2582580643	TE05716	Trout Bog Epilimnion	Bacteroidetes;Sphingobacteriia;Sphingobacteriales;;;	Phylosift		1575342	61.9595	0.552819	0.3443	0.271477	1.621	1539
2582580644	TE00755	Trout Bog Epilimnion	Proteobacteria;Alphaproteobacteria;Rickettsiales;;;	Phylosift		1521491	98.1043	2.8436	0.3495	0.258	1.635	1460
2582580646	TE08031	Trout Bog Epilimnion	Proteobacteria;Gammaproteobacteria;Methylococcales;;;	Phylosift		1642485	72.7186	1.90215	0.3878	0.25913	1.67	1648
2582580647	TE08052	Trout Bog Epilimnion	Bacteroidetes;Sphingobacteriia;Sphingobacteriales;;;	Phylosift		2139573	80.416	2.13465	0.3821	0.261176	1.645	2169
2582580648	TE00911	Trout Bog Epilimnion	Acidobacteria;Holophagae;Holophagales;;;	Phylosift		3001284	95.6871	3.50877	0.6737	0.455867	1.721	2829
2582580649	TE00913	Trout Bog Epilimnion	Proteobacteria;Betaproteobacteria;Nitrosomonadales;Methylophilaceae;Methylopumilus(LD28);	Phylogeny	High	942700	75.5035	2.92023	0.3643	0.295895	1.661	1077
2582580650	TE09727	Trout Bog Epilimnion	Proteobacteria;Alphaproteobacteria;[Blank];;;	Phylosift		899066	81.0558	0.0708717	0.2893	0.393642	1.664	1009
2582580651	TH00111	Trout Bog Hypolimnion	Chlorobi;Chlorobia;Chlorobiales;;;	Phylosift		2314202	91.7033	0.659341	0.4616	0.184971	1.665	2269
2582580652	TH01225	Trout Bog Hypolimnion	[Blank];[Blank];[Blank];;;	Phylosift		915278	63.3903	0	0.4063	0.21399	1.647	944
2582580653	TH01542	Trout Bog Hypolimnion	Proteobacteria;Betaproteobacteria;Burkholderiales;Comamonadaceae;Rhodoferax;	Phylogeny	Medium	3722418	95.1713	0.272586	0.6254	0.321277	1.691	3498
2582580654	TH01998	Trout Bog Hypolimnion	Proteobacteria;Betaproteobacteria;Burkholderiales;Burkholderiaceae;Polynucleobacter;PnecC	Phylogeny	High	2301184	98.2578	2.84553	0.3651	0.262946	1.612	2337
2582580657	TH02152	Trout Bog Hypolimnion	Actinobacteria;Actinobacteria;Actinomycetales;acI;acI-B;	Phylogeny	High	845311	61.3283	0.394737	0.464	0.196254	1.63	952
2582580658	TH02159	Trout Bog Hypolimnion	Proteobacteria;Betaproteobacteria;Burkholderiales;Comamonadaceae;Rhodoferax;	Phylogeny	Medium	3815911	92.4218	1.7134	0.6112	0.306937	1.677	3672
2582580659	TH02160	Trout Bog Hypolimnion	Proteobacteria;Betaproteobacteria;Burkholderiales;Comamonadaceae;Rhodoferax;	Phylogeny	Medium	3407684	64.6552	1.72414	0.6208	0.341426	1.672	3377
2582580662	TH00254	Trout Bog Hypolimnion	Acidobacteria;Holophagae;Holophagales;;;	Phylosift		2981798	80.0439	0.877193	0.6746	0.455371	1.721	2814
2582580663	TH02565	Trout Bog Hypolimnion	[Blank];[Blank];[Blank];;;	Phylosift		843861	65.3465	1.9802	0.3814	0.279012	1.623	864
2582580664	TH02746	Trout Bog Hypolimnion	Verrucomicrobia;Verrucomicrobiae;Verrucomicrobiales;;;	Phylosift		6521824	76.1611	1.70068	0.6206	0.310199	1.678	5372
2582580665	TH02747	Trout Bog Hypolimnion	Verrucomicrobia;Verrucomicrobiae;Verrucomicrobiales;;;	Phylosift		5159489	92.4295	9.45946	0.5832	0.286163	1.693	4793
2582580668	TH03004	Trout Bog Hypolimnion	Verrucomicrobia;Verrucomicrobiae;Verrucomicrobiales;;;	Phylosift		4497082	93.2432	6.25	0.5683	0.262791	1.68	3743
2582580669	TH03063	Trout Bog Hypolimnion	Bacteroidetes;Sphingobacteriia;Sphingobacteriales;;;	Phylosift		3174086	89.1544	4.53202	0.348	0.281602	1.635	3142
2582580670	TH03180	Trout Bog Hypolimnion	Actinobacteria;[Blank];[Blank];;;	Phylosift		1149636	67.2414	0.862069	0.4956	0.187349	1.642	1217
2582580671	TH03219	Trout Bog Hypolimnion	Actinobacteria;Actinobacteria;Acidimicrobiales;;;	Phylosift		1170081	80.6527	1.28205	0.5473	0.191591	1.646	1270
2582580672	TH03273	Trout Bog Hypolimnion	Acidobacteria;Holophagae;Holophagales;;;	Phylosift		3335528	80.7018	1.82749	0.6606	0.437303	1.703	3116
2582580673	TH03311	Trout Bog Hypolimnion	Bacteroidetes;Bacteroidia;Bacteroidales;;;	Phylosift		3778915	97.8495	1.12414	0.4703	0.156813	1.647	3165
2582580674	TH03415	Trout Bog Hypolimnion	Proteobacteria;Betaproteobacteria;Gallionellales;;;	Phylosift		2657023	97.1429	0.396825	0.5185	0.204571	1.685	2581
2582580675	TH03463	Trout Bog Hypolimnion	Actinobacteria;Actinobacteria;Actinomycetales;acI;acI-B;	Phylogeny	High	1214182	76.7669	0.263158	0.4736	0.167173	1.634	1280
2582580677	TH03552	Trout Bog Hypolimnion	Proteobacteria;Gammaproteobacteria;Methylococcales;;;	Phylosift		2227372	97.2126	0.692042	0.3986	0.253801	1.645	2192
2582580679	TH03772	Trout Bog Hypolimnion	[Blank];[Blank];[Blank];;;	Phylosift		823317	79.588	0	0.3552	0.268219	1.621	820
2582580680	TH03815	Trout Bog Hypolimnion	Actinobacteria;Actinobacteria;Solirubrobacterales;;;	Phylosift		2533346	75.1437	0.287356	0.6938	0.507306	1.668	2677
2582580682	TH04093	Trout Bog Hypolimnion	Verrucomicrobia;Verrucomicrobiae;Verrucomicrobiales;;;	Phylosift		4730745	81.8273	3.71622	0.4777	0.203779	1.661	3938
2582580683	TH04247	Trout Bog Hypolimnion	Proteobacteria;Alphaproteobacteria;Rickettsiales;;;	Phylosift		1544655	98.1043	2.8436	0.3493	0.258554	1.636	1486
2582580684	TH00433	Trout Bog Hypolimnion	Proteobacteria;Deltaproteobacteria;Desulfobacterales;;;	Phylosift		3073408	77.193	0	0.5301	0.202471	1.68	2823
2582580685	TH04436	Trout Bog Hypolimnion	Bacteroidetes;Sphingobacteriia;Sphingobacteriales;;;	Phylosift		3044346	94.844	1.74056	0.367	0.256372	1.636	2773
2582580686	TH04491	Trout Bog Hypolimnion	Proteobacteria;Gammaproteobacteria;Legionellales;;;	Phylosift		1738602	81.686	1.58915	0.3711	0.270892	1.666	1599
2582580687	TH04565	Trout Bog Hypolimnion	Acidobacteria;Holophagae;Holophagales;;;	Phylosift		3680673	78.3333	2.63158	0.6892	0.540968	1.709	3551
2582580688	TH04590	Trout Bog Hypolimnion	Verrucomicrobia;Opitutae;[Blank];;;	Phylosift		3289830	88.5959	2.05479	0.6535	0.397039	1.717	3088
2582580689	TH04645	Trout Bog Hypolimnion	Proteobacteria;Deltaproteobacteria;Desulfuromonadales;;;	Phylosift		5793761	88.341	0.806452	0.6115	0.337515	1.664	5076
2582580690	TH04697	Trout Bog Hypolimnion	Bacteroidetes;Flavobacteriia;Flavobacteriales;;;	Phylosift		2035176	62.21	0	0.3201	0.342292	1.622	2183
2582580691	TH04820	Trout Bog Hypolimnion	Verrucomicrobia;Verrucomicrobiae;Verrucomicrobiales;;;	Phylosift		2963500	55.7328	1.54965	0.6267	0.368452	1.727	2765
2582580692	TH04848	Trout Bog Hypolimnion	Bacteroidetes;Bacteroidia;Bacteroidales;;;	Phylosift		2833050	61.3082	0	0.36	0.239407	1.635	2691
2582580693	TH04964	Trout Bog Hypolimnion	Proteobacteria;[Blank];[Blank];;;	Phylosift		819508	60.6553	0	0.469	0.206619	1.626	840
2582580694	TH05247	Trout Bog Hypolimnion	Bacteroidetes;Flavobacteriia;Flavobacteriales;;;	Phylosift		2536172	63.9498	0	0.4501	0.160729	1.614	2055
2582580695	TH05354	Trout Bog Hypolimnion	Ignavibacteria;[Blank];[Blank];;;	Phylosift		4310034	96.9274	5.58659	0.3531	0.244055	1.619	3689
2582580697	TH05629	Trout Bog Hypolimnion	Ignavibacteria;Ignavibacteria;Ignavibacteriales;;;	Phylosift		4397594	97.2067	0.558659	0.3637	0.220948	1.612	3702
2582580698	TH05702	Trout Bog Hypolimnion	Proteobacteria;Alphaproteobacteria;Rickettsiales;;;	Phylosift		1348795	94.7867	5.21327	0.3355	0.276707	1.629	1280
2582580699	TH05737	Trout Bog Hypolimnion	Proteobacteria;Deltaproteobacteria;Bdellovibrionales;;;	Phylosift		1679340	80.3013	0	0.4041	0.247049	1.71	1472
2582580700	TH05891	Trout Bog Hypolimnion	Proteobacteria;Betaproteobacteria;Burkholderiales;;;	Phylosift		3181706	91.1908	0.478972	0.5419	0.221034	1.67	3041
2582580701	TH06070	Trout Bog Hypolimnion	Proteobacteria;Gammaproteobacteria;Pseudomonadales;;;	Phylosift		878995	79.4198	0	0.3349	0.319742	1.642	922
2582580702	TH06286	Trout Bog Hypolimnion	Bacteroidetes;Bacteroidia;Bacteroidales;;;	Phylosift		5154715	90.8602	3.36022	0.3985	0.190934	1.64	4340
2582580703	TH06717	Trout Bog Hypolimnion	Proteobacteria;Alphaproteobacteria;Rhizobiales;;;	Phylosift		1942197	83.2681	2.31884	0.6213	0.357283	1.672	2168
2582580705	TH00680	Trout Bog Hypolimnion	Actinobacteria;Actinobacteria;[Blank];;;	Phylosift		1257796	72.7011	3.44828	0.5012	0.162387	1.626	1309
2582580706	TH07795	Trout Bog Hypolimnion	[Blank];[Blank];[Blank];;;	Phylosift		819610	71.9101	1.1236	0.4555	0.235234	1.662	844
2582580708	TH07934	Trout Bog Hypolimnion	Bacteroidetes;Bacteroidia;Bacteroidales;;;	Phylosift		2314650	62.2939	0.537634	0.3646	0.25373	1.638	2224
2582580711	TH00944	Trout Bog Hypolimnion	Proteobacteria;Betaproteobacteria;Burkholderiales;Burkholderiaceae;Polynucleobacter;PnecC	Phylogeny	High	1737056	69.8276	1.72414	0.4607	0.193204	1.652	1902
2582580712	TH00953	Trout Bog Hypolimnion	Proteobacteria;Betaproteobacteria;Nitrosomonadales;Methylophilaceae;Methylopumilus(LD28);	Phylogeny	High	1556854	93.1649	2.53158	0.4214	0.218587	1.663	1569
2593339176	TH00545v2	Trout Bog Hypolimnion	Proteobacteria;Betaproteobacteria;Nitrosomonadales;Methylophilaceae;Methylotenera;	Phylogeny	High	1431993	89.6368	0.854701	0.4261	0.201092	1.651	1411
2593339177	TH00941v2	Trout Bog Hypolimnion	Proteobacteria;Betaproteobacteria;Burkholderiales;Burkholderiaceae;Polynucleobacter;PnecC	Phylogeny	High	1496525	57.2414	0	0.4483	0.187258	1.654	1553
2593339178	TH02062v2	Trout Bog Hypolimnion	Proteobacteria;Gammaproteobacteria;Methylococcales;;;	Phylosift		3124798	93.6811	3.50058	0.3969	0.258984	1.653	2879
2593339179	TH02086v2	Trout Bog Hypolimnion	Bacteroidetes;Bacteroidia;Bacteroidales;;;	Phylosift		3680027	72.4138	1.72414	0.4338	0.157443	1.644	2932
2593339181	TH02519v2	Trout Bog Hypolimnion	Verrucomicrobia;Opitutae;[Blank];;;	Phylosift		1808963	71.5351	0.342466	0.4182	0.203209	1.66	1623
2593339182	TH02902v2	Trout Bog Hypolimnion	Proteobacteria;Betaproteobacteria;Nitrosomonadales;Methylophilaceae;Methylopumilus(LD28);	Phylogeny	High	1002927	62.069	3.44828	0.3629	0.29165	1.66	1146
2593339183	TH02922v2	Trout Bog Hypolimnion	Proteobacteria;Deltaproteobacteria;Desulfobacterales;;;	Phylosift		3798404	93.3642	0	0.5232	0.187665	1.681	3338
2593339184	TH03520v2	Trout Bog Hypolimnion	Chlorobi;Chlorobia;Chlorobiales;;;	Phylosift		2156671	89.2857	1.0989	0.4586	0.190601	1.666	2194
2593339185	TH03765v2	Trout Bog Hypolimnion	Actinobacteria;Actinobacteria;Acidimicrobiales;;;	Phylosift		1315659	76.0684	0.42735	0.5637	0.168511	1.637	1353
2593339187	TE00439v2	Trout Bog Hypolimnion	Proteobacteria;Betaproteobacteria;Nitrosomonadales;;;	Phylosift		996711	67.0246	1.23749	0.528	0.222607	1.699	1072
2593339188	TE00788v2	Trout Bog Hypolimnion	Proteobacteria;Betaproteobacteria;Burkholderiales;Burkholderiaceae;Polynucleobacter;PnecC	Phylogeny	High	990006	56.8966	1.72414	0.4727	0.183109	1.664	1104
2593339189	TE01800v2	Trout Bog Hypolimnion	Verrucomicrobia;Opitutae;[Blank];;;	Phylosift		2186907	89.4574	2.05479	0.419	0.203843	1.657	1957
2593339190	TE02057v2	Trout Bog Hypolimnion	Actinobacteria;Actinobacteria;Actinomycetales;acI;acI-B;	Phylogeny	High	971617	73.7845	3.93484	0.4987	0.183621	1.633	1030
2593339191	TH01380	Trout Bog Hypolimnion	Proteobacteria;Gammaproteobacteria;Methylococcales;;;	Phylosift		2299825	68.4211	0	0.4143	0.230925	1.65	2043
2593339192	TH01381	Trout Bog Hypolimnion	Proteobacteria;Betaproteobacteria;Nitrosomonadales;Methylophilaceae;Methylotenera;	Phylogeny	High	1077715	50	0	0.4329	0.208275	1.653	1104
