# Supplementary material for: Freshwater carbon and nutrient cycles revealed through reconstructed population genomes
Source: PeerJ. 2018 Dec 10;6:e6075. doi: 10.7717/peerj.6075 (PMC6292386; doi:10.7717/peerj.6075)
Supplement: Supplemental Information 8 — This dataset is the input to Fig. 2 and contains pathway completeness estimates for each MAG individually. [file peerj-06-6075-s008.xlsx]

## Sheet: Sheet1
IMG_OID	2582580540	2582580545	2582580562	2582580579	2582580513	2582580517	2582580520	2582580528	2582580530	2582580539	2582580544	2582580550	2582580553	2582580554	2582580555	2582580564	2582580565	2582580572	2582580575	2582580595	2582580608	2582580519	2582580526	2582580527	2582580532	2582580533	2582580535	2582580541	2582580543	2582580548	2582580549	2582580563	2582580568	2582580571	2582580580	2582580582	2582580583	2582580585	2582580586	2582580587	2582580588	2582580589	2582580590	2582580592	2582580596	2582580597	2582580599	2582580601	2582580602
Taxonomy	[Blank];[Blank];[Blank];;;	[Blank];[Blank];[Blank];;;	[Blank];[Blank];[Blank];;;	[Blank];[Blank];[Blank];;;	Actinobacteria;Actinobacteria;Actinomycetales;;;	Actinobacteria;Actinobacteria;Acidimicrobiales;;;	Actinobacteria;Actinobacteria;Acidimicrobiales;;;	Actinobacteria;Actinobacteria;[Blank];;;	Actinobacteria;Actinobacteria;Acidimicrobiales;;;	Actinobacteria;Actinobacteria;Acidimicrobiales;;;	Actinobacteria;Actinobacteria;Acidimicrobiales;;;	Actinobacteria;Actinobacteria;[Blank];;;	Actinobacteria;Actinobacteria;Actinomycetales;;;	Actinobacteria;Actinobacteria;Acidimicrobiales;;;	Actinobacteria;Actinobacteria;[Blank];;;	Actinobacteria;Actinobacteria;[Blank];;;	Actinobacteria;Actinobacteria;Acidimicrobiales;;;	Actinobacteria;Actinobacteria;[Blank];;;	Actinobacteria;Actinobacteria;[Blank];;;	Actinobacteria;Actinobacteria;Actinomycetales;;;	Actinobacteria;Actinobacteria;[Blank];;;	Bacteroidetes;Cytophagia;Cytophagales;;;	Bacteroidetes;Flavobacteriia;Flavobacteriales;;;	Bacteroidetes;Flavobacteriia;Flavobacteriales;;;	Bacteroidetes;Sphingobacteriia;Sphingobacteriales;;;	Bacteroidetes;Sphingobacteriia;Sphingobacteriales;;;	Bacteroidetes;Sphingobacteriia;Sphingobacteriales;;;	Bacteroidetes;Sphingobacteriia;Sphingobacteriales;;;	Bacteroidetes;Flavobacteriia;Flavobacteriales;;;	Bacteroidetes;Sphingobacteriia;Sphingobacteriales;;;	Bacteroidetes;Flavobacteriia;Flavobacteriales;;;	Bacteroidetes;Sphingobacteriia;Sphingobacteriales;;;	Bacteroidetes;Flavobacteriia;Flavobacteriales;;;	Bacteroidetes;Sphingobacteriia;[Blank];;;	Bacteroidetes;Flavobacteriia;Flavobacteriales;;;	Bacteroidetes;[Blank];[Blank];;;	Bacteroidetes;Sphingobacteriia;[Blank];;;	Bacteroidetes;Sphingobacteriia;Sphingobacteriales;;;	Bacteroidetes;[Blank];[Blank];;;	Bacteroidetes;Sphingobacteriia;Sphingobacteriales;;;	Bacteroidetes;Sphingobacteriia;Sphingobacteriales;;;	Bacteroidetes;Sphingobacteriia;Sphingobacteriales;;;	Bacteroidetes;Sphingobacteriia;Sphingobacteriales;;;	Bacteroidetes;Flavobacteriia;Flavobacteriales;;;	Bacteroidetes;Sphingobacteriia;Sphingobacteriales;;;	Bacteroidetes;Flavobacteriia;Flavobacteriales;;;	Bacteroidetes;[Blank];[Blank];;;	Bacteroidetes;Sphingobacteriia;Sphingobacteriales;;;	Bacteroidetes;Flavobacteriia;Flavobacteriales;;;
Calvin Cycle (must have RuBisCo)												82
rTCA (must have a marker gene)	90																			80			70		80	80	70	80		60		60						70			70	80	60		80			80
Wood-Ljungdahl
Methane oxidation to methanol
Methanol oxidation to formaldehyde	100
Formaldehyde oxidation to formate (max completeness of all possible pathways)	80	50	50		50	100	50	100	100	100	50	50	50	50	50	50	100	50	50	50	50	50	100	100	50	50	50	50	50	50	50	50	50	50	50	50	100	50		50	100	50		100	50		100	100	50
Methylamine oxidation to formaldehyde (pathway 1 only, others not well annotated)
Formate oxidation to CO2								100			100									100			100																		100
Formaldehyde assimilation-serine	56										56
Formaldehyde assimilation-RuMP	100											67							67					67	67			67	67		67											67		67	67
Formaldehyde assimilation-xylulose MP																								50	50				50		50											50		50	50	50
Nitrogen Fixation (max completeness of all possible pathways)
Assimilatory nitrate reduction						50				50	50
Dissimilatory nitrate reduction (must have nirB or nirD)	100
Denitrification
TMAO reductase	100				100	100	100		100	100	100			100			100												100
alkanesulfonate oxidation to sulfite	100					100				100	100			100																								100				100
Sulfate transport (max completeness of all possible pathways)	67				100
Assimilatory sulfate reduction (must have a unique gene)	100				100					100	100				67	67	100		67			67				100	100			67		67						67									100		67
Dissimilatory sulfate reduction (must have a unique gene)																						100		100
SOX (having cytochrome c only doesn't count)
Phosphate transport (max completeness of all possible pathways)	100	100			100	100	100	100	100	100	100	100	100	100	100	100	100	100	100	100	100	100	100		100	100		100	100	100	100	100	100		100	100	100		100	100	100	100			100		100	100	100
Polyphosphate storage and utilization	100	100				100			100	100	100	100	100	100	100		100	100	100	100		100	100	100	100	100		100	100	100	100	100		100	100	100	100	100	100	100	100	100		100	100	100	100	100
TCA	100	88			75	100	88	75	75	100	100	100	88	100	88	100	50	100	100	100	63	63	88	75	100	75	88	100	75	88	100	88	100	63	63	75	88	88	88	63	100	100	88	88	100	88	100	88	75
Pentose Phosphate oxidative phase	100		100	100	100	71		71		71	71	71	100	71	57	57	71	71	57		57																									50		100
Pentose phosphate non-oxidative phase	75	100	75	50	100	100	75	100	50	100	100	100	100	100	75	75	100	100	75		75	75	100	75	75	50	75	100	75	100	75	100	50	100	50	100	50		75	50	100	100	75	100	75	50	100	100	50
Entner-Doudoroff (must have edd gene)																																														100
Rhamnose (max completeness of all possible pathways; pathway I must contain unique gene if used)	50															100			75			100			50	100	100	50										100				50						75
Fucose (must have unique gene)	75																										75
Arabinose (must have unique gene)	67											67																										67
Xylose (must have unique gene)	100						100	100			50	50			50	50			100			100			100	50	100	50										100				100						50
Mannose (must have unique gene)	100	50		50		100		100		50	100	100	100	100	100	100	100		100				50	50	100	100	100	100	50	50	50	50	50	50		50	50	100	50	50	50	100		50	50	50			50
Galacturonate (must have unique gene)	80															80			60			80			100	80												80				80						100
Galactose (max completeness of all possible pathways, must have unique gene if pathway requires)	75						75		100	100				100			100					50			50		57															75		100	50			100
Trehalose biosynthesis (must have unique gene, max completeness of all possible pathways)	100				60														60
Glyoxylate cycle (must have unique gene)	100				80							100								80			80
Glycolate																67	100		67
Urea Cycle	60					60			60		60	60	60	60			60	60	60						60	60		60														60
Putrescine biosynthesis (max completeness of all possible pathways)	100	100				50		50	50	67		50	67		50	50	50				50	67	100	100	67	50	100	100	50	100	100	50	100	100	50	100	50	100	100	50	100	100	50	100	100	100	100	67
Spermidine biosynthesis (max completeness of all possible pathways)	50	50			50	50	50		50	50	50	50	50	50			50						50	50	50	50	50	50	50	50	50	50	50	50		75	50	75	50			50	50	50	50	50	50	100
Spermine biosynthesis				50																																												50
Putrescine degradation (max completeness of all possible pathways)	100	50	50		100	100	50	50	50	100	100	100		100	50	50	50	50	50	50	100	100	100	100	100	100	100	100	100	100	100	100	100	100	50	100	100	100	100		100	100	50	100	100	100	100	100	100
Urea degradation (max completeness of all possible pathways)	50	50	100																	100
Chitin degradation	50	50	100		50			50				50			50				50			50	50	50	100	100	50						100			50		50	50		100	100			100	50	100	50
NAG degradation	67				67				67												67	67			67	67		67														67			67
Cyanophycin degradation (max completeness of all possible pathways)	50	50	100		100			100			100	100									100		100	100		100				100	100	100	100				100	100	100		100	100		100	100	100
Benzene/toluene degradation	50			50		50	50	50		50	50	50	50		50	50	50		50						50	50	50	50											50						50		50
Benzene degradation
Benzoyl-CoA degradation
Benzoate degradation (max completeness of all possible pathways)			50
Salicylate degradation
Phthalate degredation
Rhodopsin		100			100		100	100	100	100		100	100		100	100		100	100				100		100	100	100	100			100	100	100	100				100		100				100	100			100	100
Photosystem II
Photosystem I
GSB-Photosystem I reaction centers
GSB-Chlorosome
RC-LH1 complex
Metabolosome	100
Oxygen tolerance	50	50	50	50	100	50	50	100	50		100	50			50	100		50	100	50		100	100	100	100	50	100	100	50	100	100	100	100	50	100		100		50	50	50	100	50	100	100	50	50	100	50
[truncated: 145 more columns]
